# Supplementary material
Source: PubMed Central journal article supplement (PMC2857112)
Supplement: supp_M109.067728_Suppdata.pdf [file supp_M109.067728_Suppdata.pdf]

## Supplementary Figure Legends

**Supplementary Fig. I.** Immunoblotting of various tissue extracts from WT and Tg mice using anti-Flag antibody. 30 $\mu$ g of protein were fractionated in each lane. Flag immunoblotting demonstrated the kidney specificity of transgene expression.

**Supplementary Fig. II.** RNA was isolated from the kidneys of WT or Tg mice with or without cisplatin, and analyzed for the levels of PPAR $\alpha$ , PPAR $\gamma$ , PGC1 $\alpha$  target genes. Data are expressed relative to the mRNA of each gene in WT mice without cisplatin and are the mean $\pm$ S.E. (n=4): \*p<0.05 vs. saline-infused WT mice, †p<0.05 vs. saline-infused TG mice.

**Supplementary Fig. III.** RNA was isolated from the kidneys of NC or CR mice with or without cisplatin, and analyzed for the levels of PPAR $\alpha$ , PPAR $\gamma$ , PGC1 $\alpha$  genes. Data are expressed relative to the mRNA of each gene in NC mice without cisplatin and are the mean $\pm$ S.E. (n=4): \*p<0.05 vs. saline-infused NC mice, †p<0.05 vs. saline-infused CR mice.

**Supplementary Fig. IV.** RNA was isolated from the kidneys of NC or CR mice with or without cisplatin, and analyzed for the levels of ACOX1 and MCAD which are also PPAR $\alpha$  target genes and play significant roles in FAO. Data are expressed relative to the mRNA of each gene in NC mice without cisplatin and are the mean $\pm$ S.E. (n=4): \*p<0.05 vs. saline-infused NC mice, †p<0.05 vs. saline-infused CR mice, §p<0.05 vs. cisplatin-infused NC mice.

**Supplementary Fig. V. A,** RNA was isolated from the kidneys of WT or Tg mice with or without cisplatin, and analyzed for the levels of CPT-1 $\alpha$  and CPT-1 $\beta$  genes. **B,** RNA was isolated from the kidneys of WT or Tg mice with or without I/R, and analyzed for the levels of CPT-1 $\alpha$  and CPT-1 $\beta$  genes. Data are expressed relative to the mRNA of each gene in WT mice without cisplatin and are the mean $\pm$ S.E. (n=4): \*p<0.05 vs. saline-infused or sham-operated WT mice, \*\*p<0.01 vs. sham-operated WT mice, †p<0.05 vs. saline-infused or sham-operated TG mice, ††p<0.01 vs. sham-operated TG mice, §p<0.05 vs. cisplatin-infused WT mice.

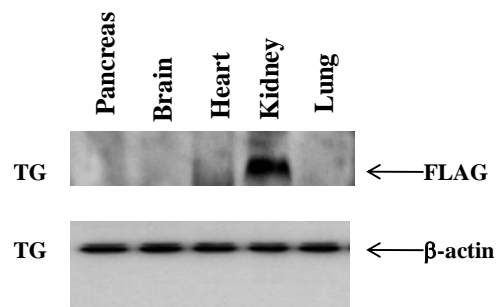

Supplementary Figure I,  
Hasegawa et al.

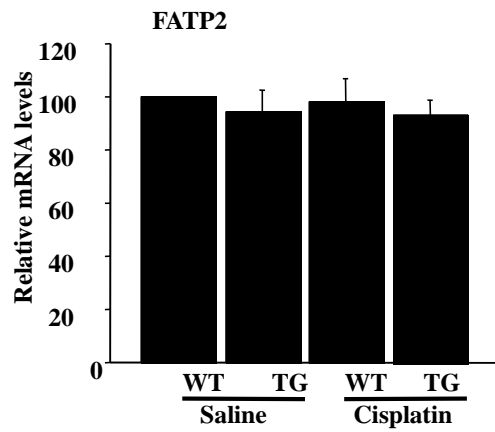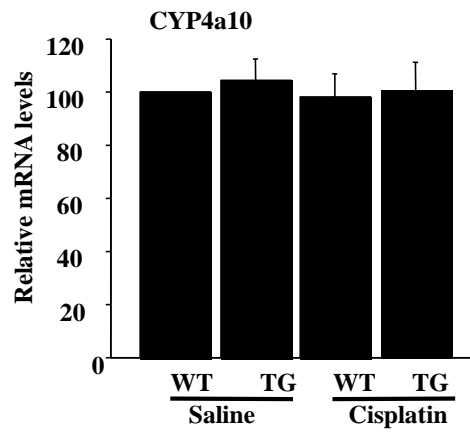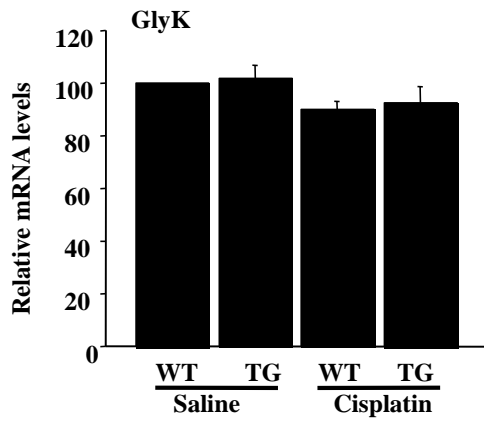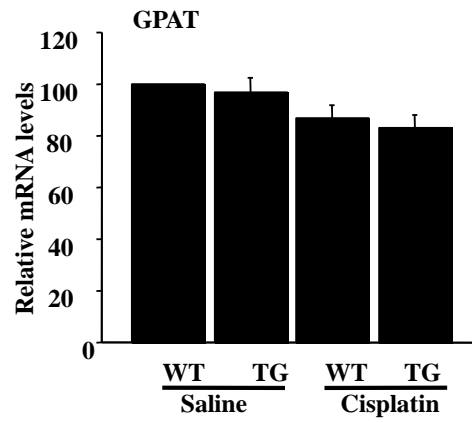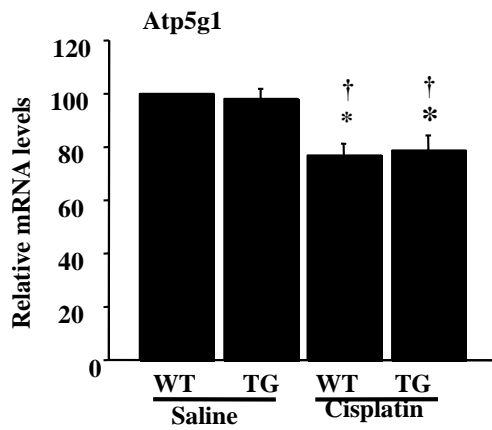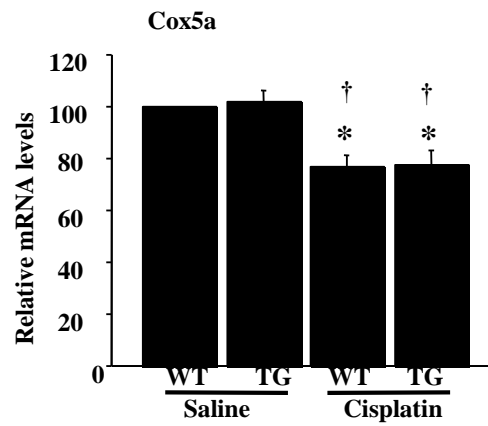

**Supplementary Figure II,  
Hasegawa et al.**

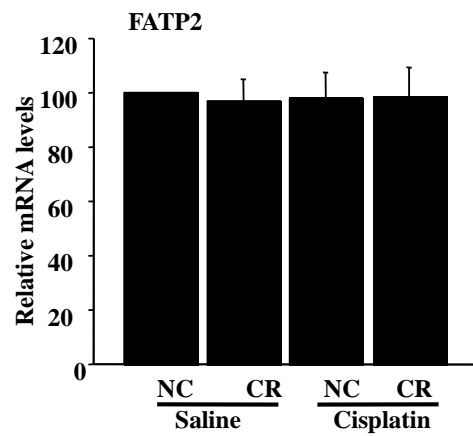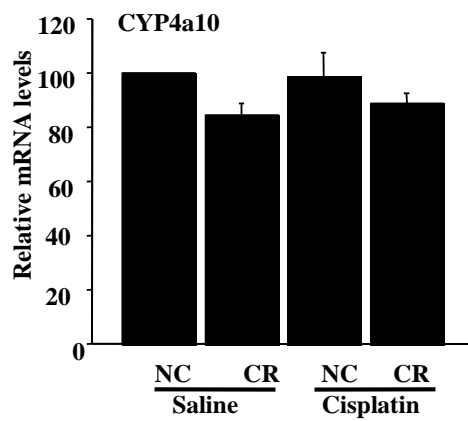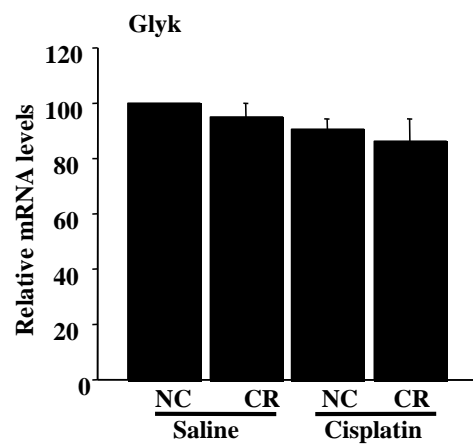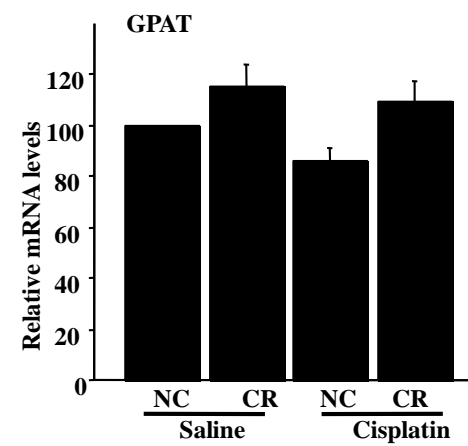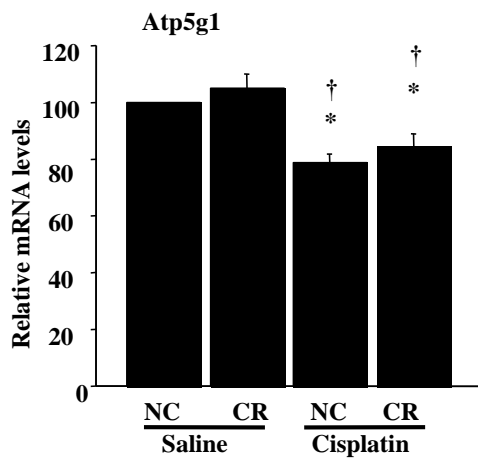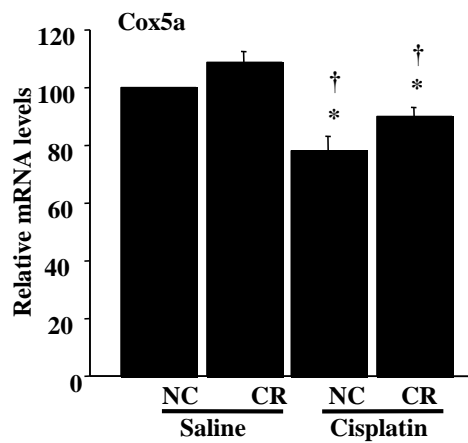

Supplementary Figure III, Hasegawa et al.

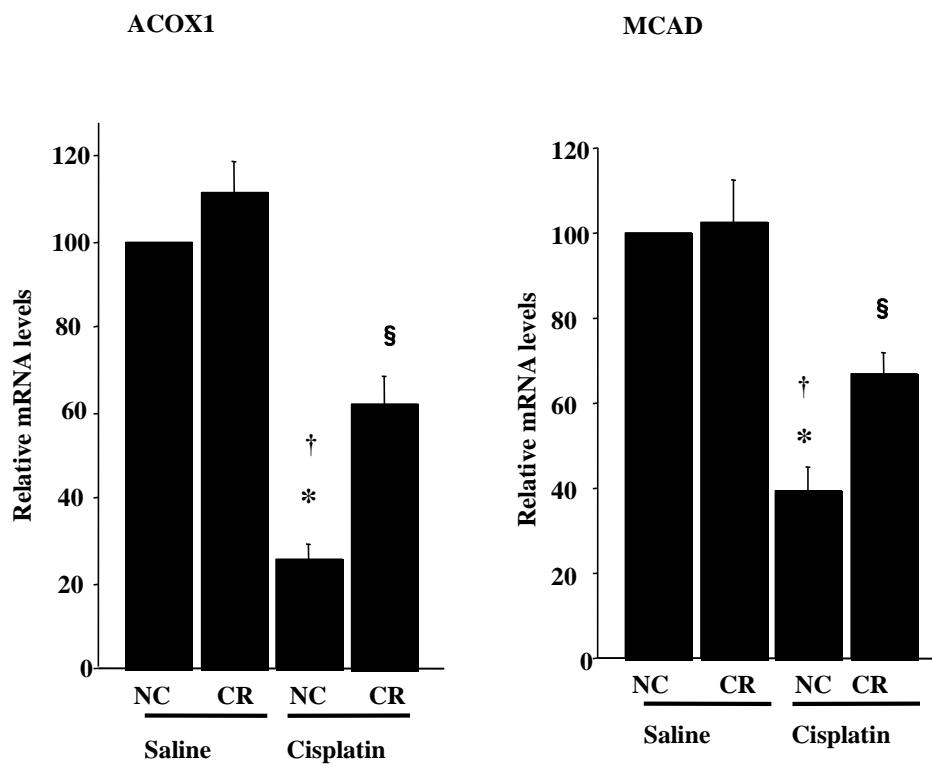

**Supplementary Figure IV,  
Hasegawa et al.**

A.

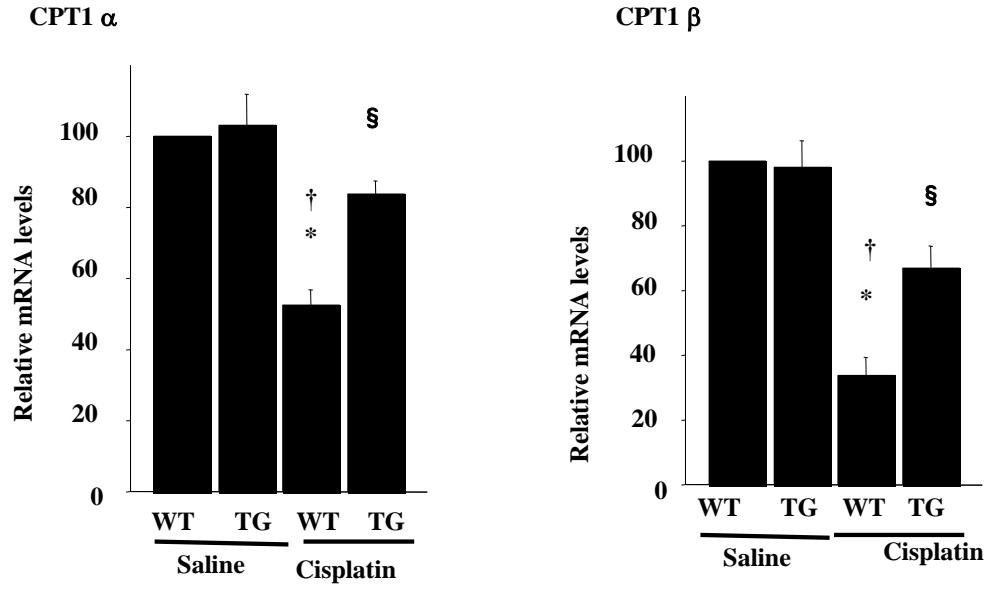

B.

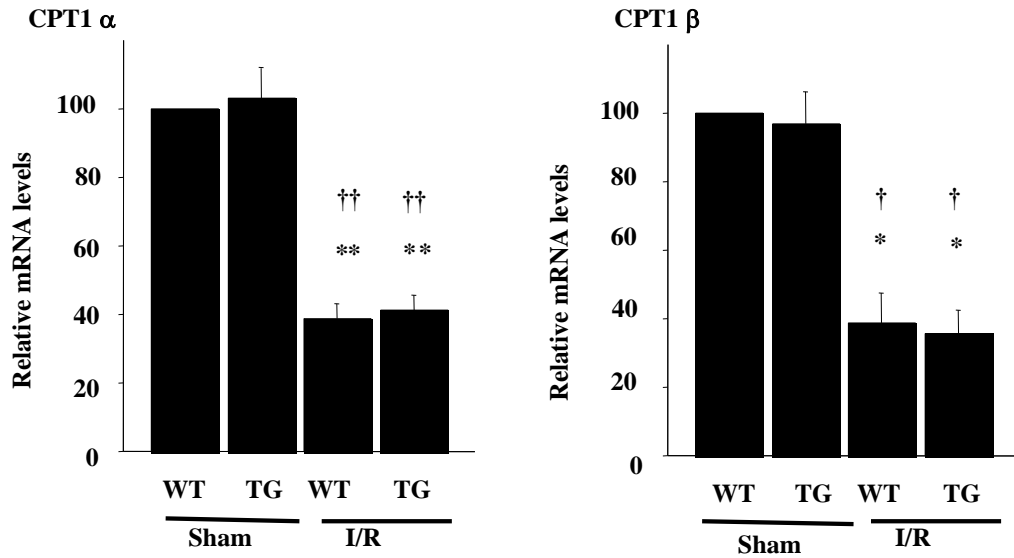

Supplementary Figure V, Hasegawa et al.

**Supplementary Table I . Primer sequences designed for the probe of Southern blotting**

|         | Product Size | Sequences                 |
|---------|--------------|---------------------------|
| Forward | 459          | TTTAATCAGGTAGTTCCTCGATGTC |
| Reverse |              | TGAACTTGAGTCTTCTGAAACATGA |

**Supplementary Table II . Primer sequences for real-time PCR**

| Gene     |                          | Sequences (5'-3')        |                        |
|----------|--------------------------|--------------------------|------------------------|
|          |                          | Forward                  | Reverse                |
| 28S rRNA | Conrol                   | AACGGCGGGAGTAACTATGA     | TAGGGACAGTGGGAATCTCG   |
| FATP-2   | PPAR alpha target genes  | ATGCCGTGTCCGTCTTTIAC     | CTTCAGACCTCCACGACTCC   |
| CYP4A10  |                          | CTCATTCCCTGCCCTTCTCAG    | GTAGTTCGAAGCGGAGCAGT   |
| ACOX1    |                          | ATGGTTTTTCGTAAGGTCCTTCCT | GGCTCGCTTCTCTTGATTTC   |
| MCAD     |                          | ATGCCCTGGATAGGAAGACA     | CATAGCCTCCGAAAATCTGC   |
| GlyK     | PPAR gamma target genes  | TGAAGTCAATTGGTTGGGTTACA  | ATGCAGCCAGTGGCTTATGAA  |
| GPAT     |                          | CAACACCATCCCCGACATC      | GTGACCTTCGATTATGCGATCA |
| Atp5g1   | PGC-1 alpha target genes | AGTTGGTGTGGCTGGATCA      | GCTGCTTGAGAGATGGGTTCC  |
| Cox5a    |                          | GGGTCACACGAGACAGATGA     | GGAACCAGATCATAGCCAACA  |

**Supplementary Table III. Primer sequences for real-time PCR**

| Gene          |                         | Sequences (5'-3')    |                      |
|---------------|-------------------------|----------------------|----------------------|
|               |                         | Forward              | Reverse              |
| 28S rRNA      | Conrol                  | AACGGCGGGAGTAACTATGA | TAGGGACAGTGGGAATCTCG |
| CPT1 $\alpha$ | PPAR alpha target genes | GATGTGGACCTGCATTCTT  | TCCTTGTAATGTGCGAGCTG |
| CPT1 $\beta$  |                         | CCCATGTGCTCCTACCAGAT | CCTTGAAGAAGCGACCTTTG |
